# Supplementary material for: Development and validation of a prognostic nomogram for predicting cancer-specific survival in advanced endometrial carcinoma after surgery: a retrospective analysis of the SEER Database
Source: HighWire-hosted journal article supplement (doi:10.1136/bmjopen-2022-070893), 2023-09-01
Supplement: bmjopen-2022-070893supp006_data_supplement.pdf [file bmjopen-2022-070893supp006_data_supplement.pdf]

Table S1 BSR, LASSO and FSR screening of variables doing predictive models for IDI, NRI comparison.

| Index          | FSR vs. LASSO |                |         | FSR vs. BSR |             |         |
|----------------|---------------|----------------|---------|-------------|-------------|---------|
|                | Estimate      | 95% CI         | P-value | Estimate    | 95% CI      | P-value |
| IDI            |               |                |         |             |             |         |
| For 1-year CSS | 0.006         | 0.002-0.012    | 0.01    | 0.013       | 0.006-0.019 | <0.001  |
| For 3-year CSS | 0.004         | 0.001-0.008    | 0.01    | 0.012       | 0.006-0.018 | <0.001  |
| For 5-year CSS | 0.003         | 0.001-0.007    | 0.01    | 0.011       | 0.006-0.016 | <0.001  |
| NRI            |               |                |         |             |             |         |
| For 1-year CSS | 0.119         | 0.034-0.174    | <0.001  | 0.214       | 0.113-0.254 | <0.001  |
| For 3-year CSS | 0.033         | (-0.013)-0.112 | 0.09    | 0.106       | 0.044-0.15  | <0.001  |
| For 5-year CSS | 0.017         | (-0.025)-0.099 | 0.289   | 0.09        | 0.053-0.128 | <0.001  |

LASSO, least absolute shrinkage and selection operator. BSR, best subsets regression. FSR, forward stepwise regression. IDI, integrated discrimination improvement. NRI, net reclassification index. CI, confidence interval.
