# Supplementary figures and images for: Development and validation of a prognostic nomogram for predicting cancer-specific survival in advanced endometrial carcinoma after surgery: a retrospective analysis of the SEER Database
Source: HighWire-hosted journal article supplement (doi:10.1136/bmjopen-2022-070893), 2023-09-01

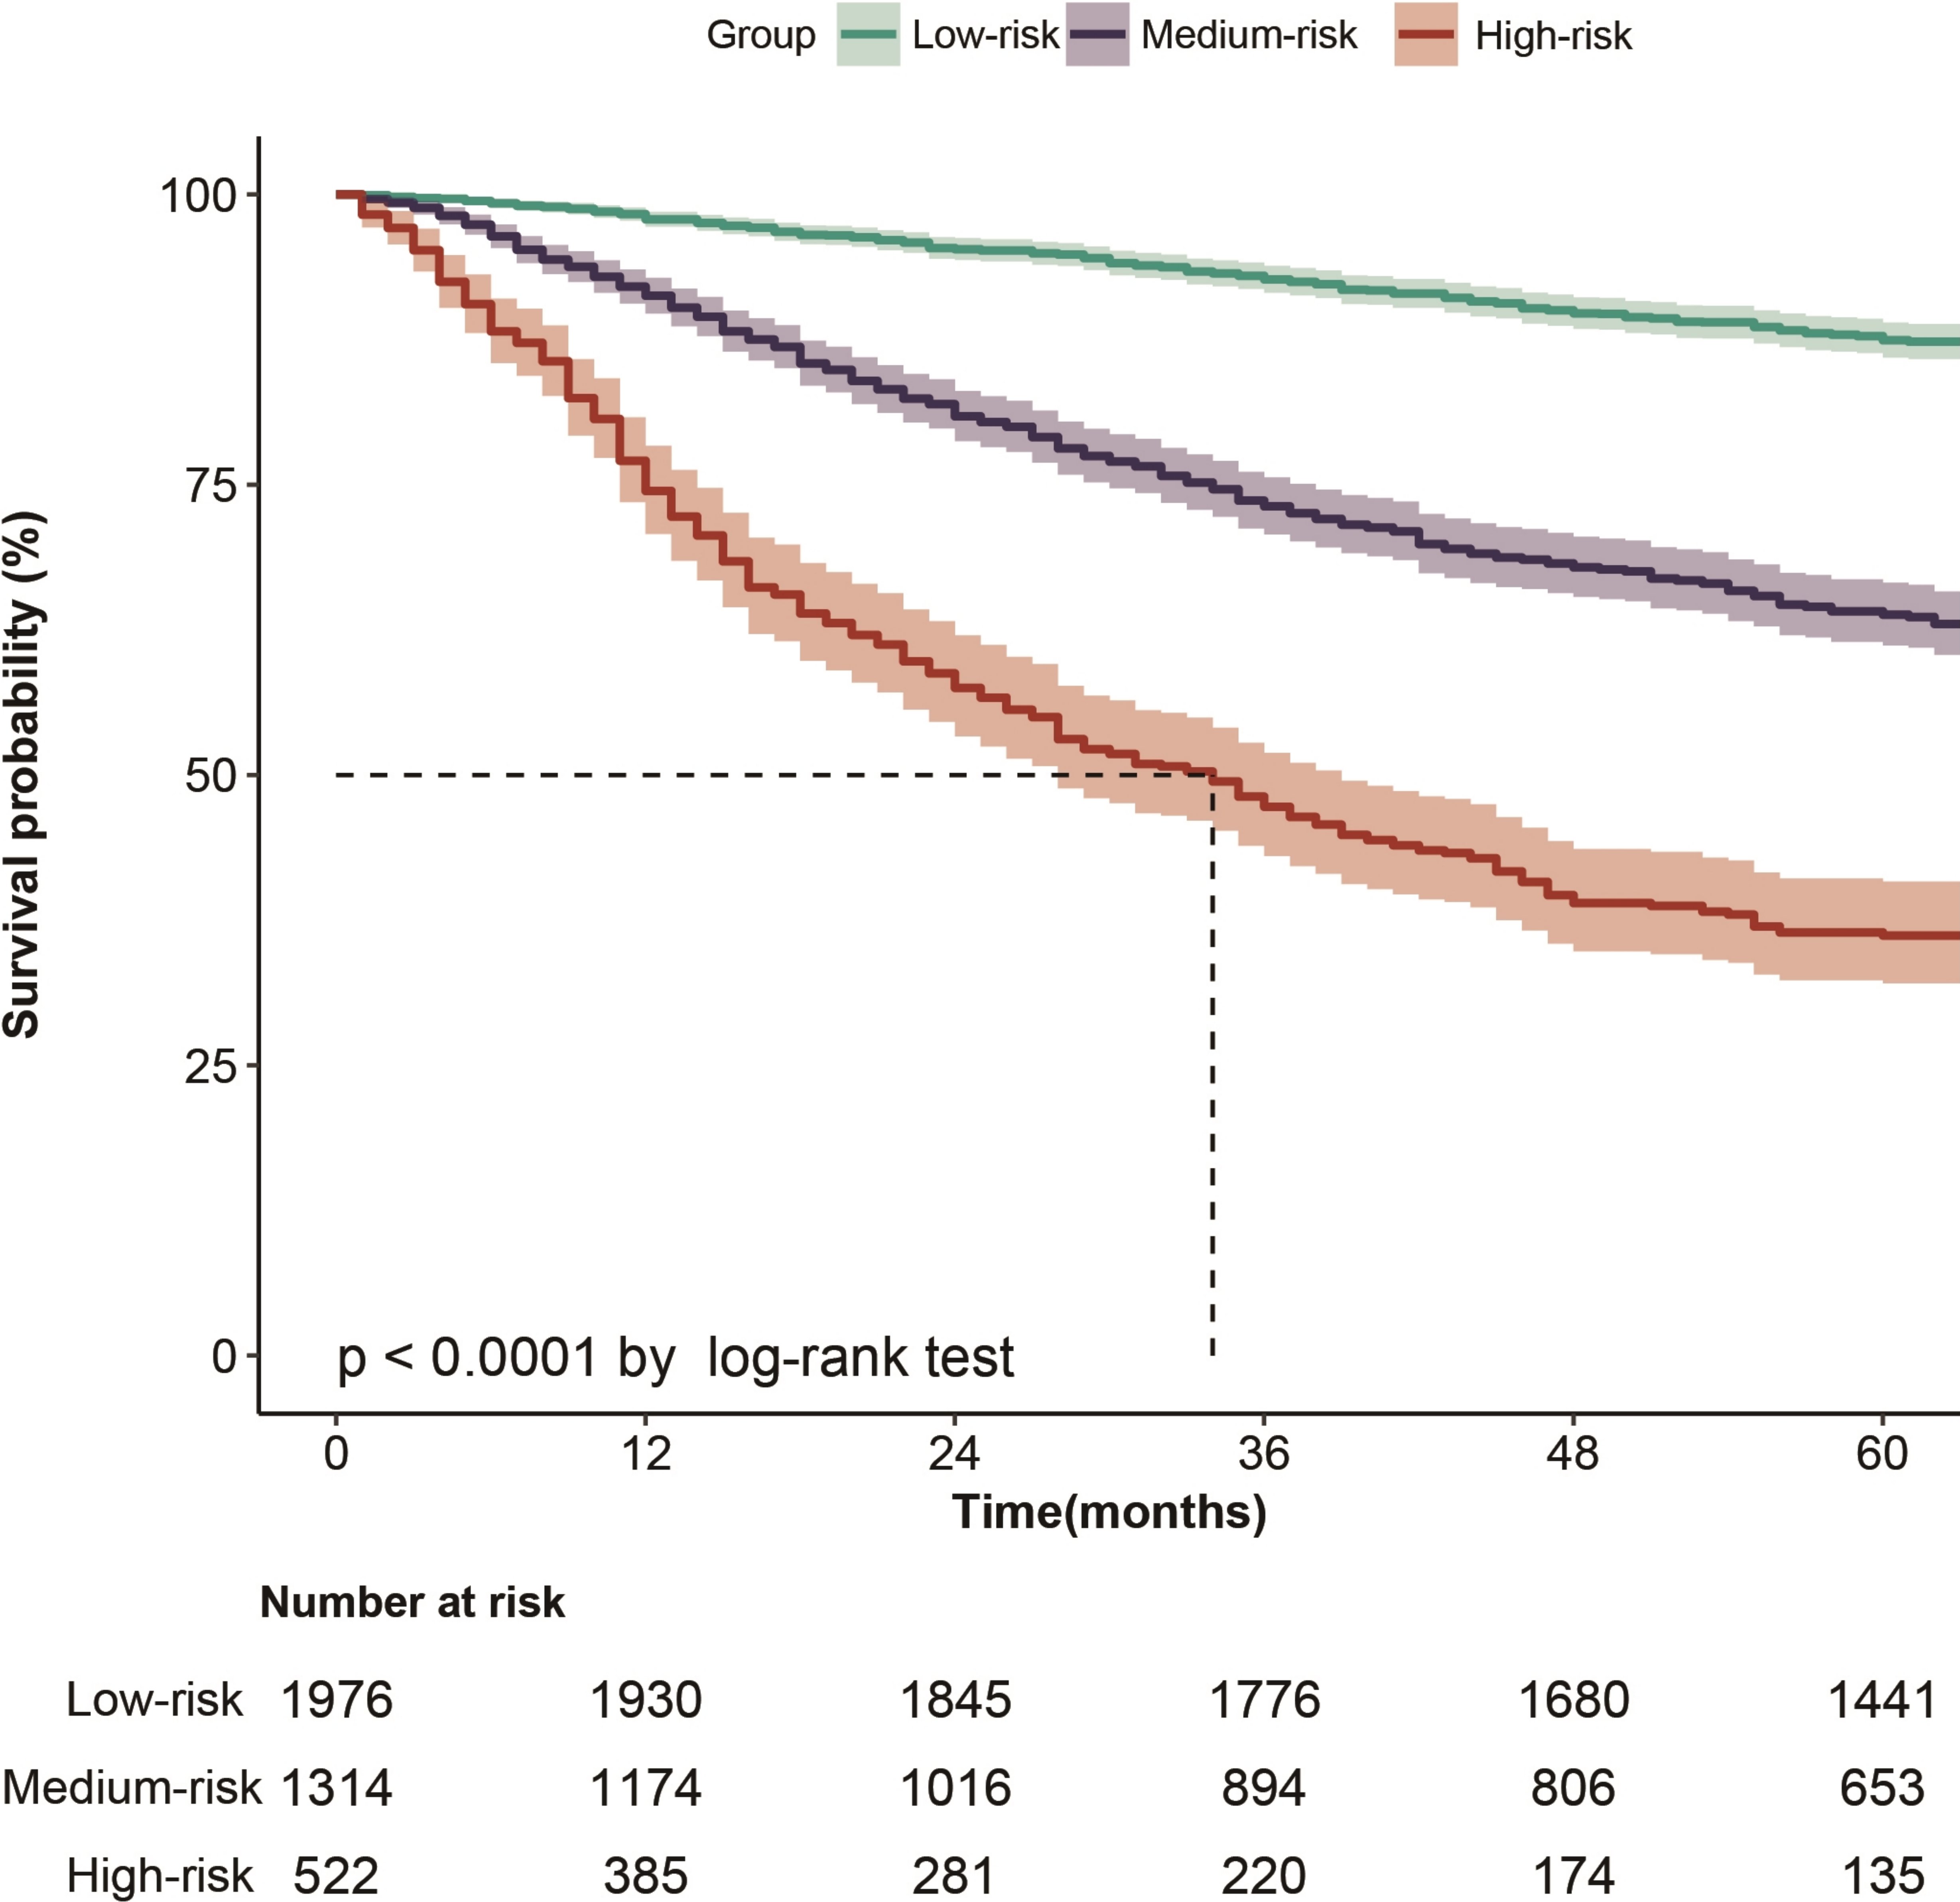

Supplementary Figure 5 Kaplan–Meier survival curve.

Supplement: bmjopen-2022-070893supp005_data_supplement.pdf [file bmjopen-2022-070893supp005_data_supplement.pdf]
